# Supplementary material
Source: JCI journal article supplement (doi:10.1172/jci173526)
Supplement: sd1 [file 1]

1 **SUPPLEMENTARY MATERIAL**

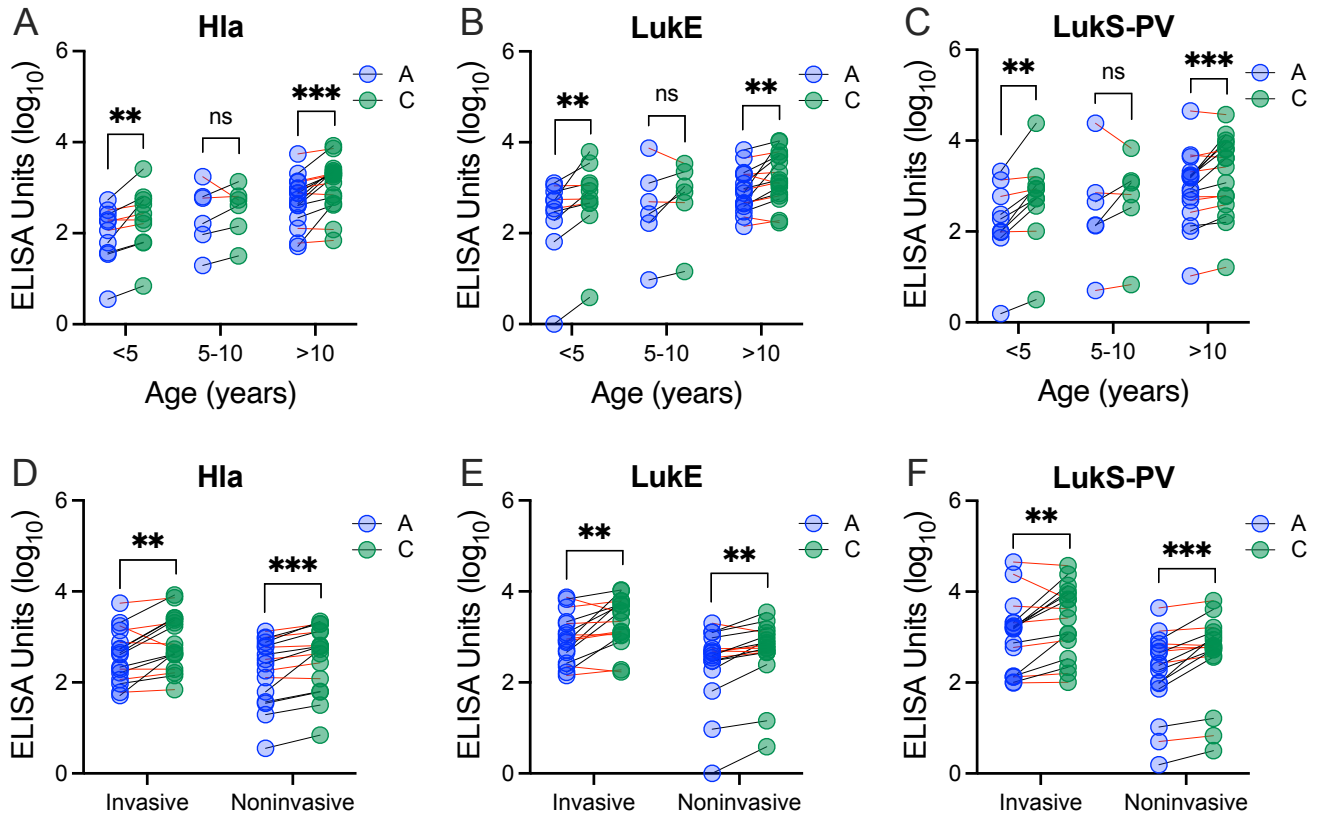

2  
 3 **Supplementary Figure 1. Impact of age and severity of infection on infection-elicited**  
 4 **increase in antibody levels.** (A-C) Change in IgG levels against Hla (A), LukE (B), and LukS-  
 5 PV (C) from acute *S. aureus* infection (A) to convalescence (C) based on the age of the study  
 6 subject. (D-F) Change in IgG levels from acute infection to convalescence based on the  
 7 severity of infection (invasive vs. non-invasive). Data are expressed as arbitrary ELISA units  
 8 (log<sub>10</sub>). Log<sub>10</sub>-transformed values were compared by Wilcoxon matched-pairs signed rank test  
 9 (A vs. C) or Mann-Whitney U test (P vs. NP). \* indicates  $p < 0.05$ ; \*\*  $p < 0.01$ ; \*\*\*  $p < 0.001$ ; \*\*\*\*  
 10  $p < 0.0001$ ; ns not significant.

11  
 12

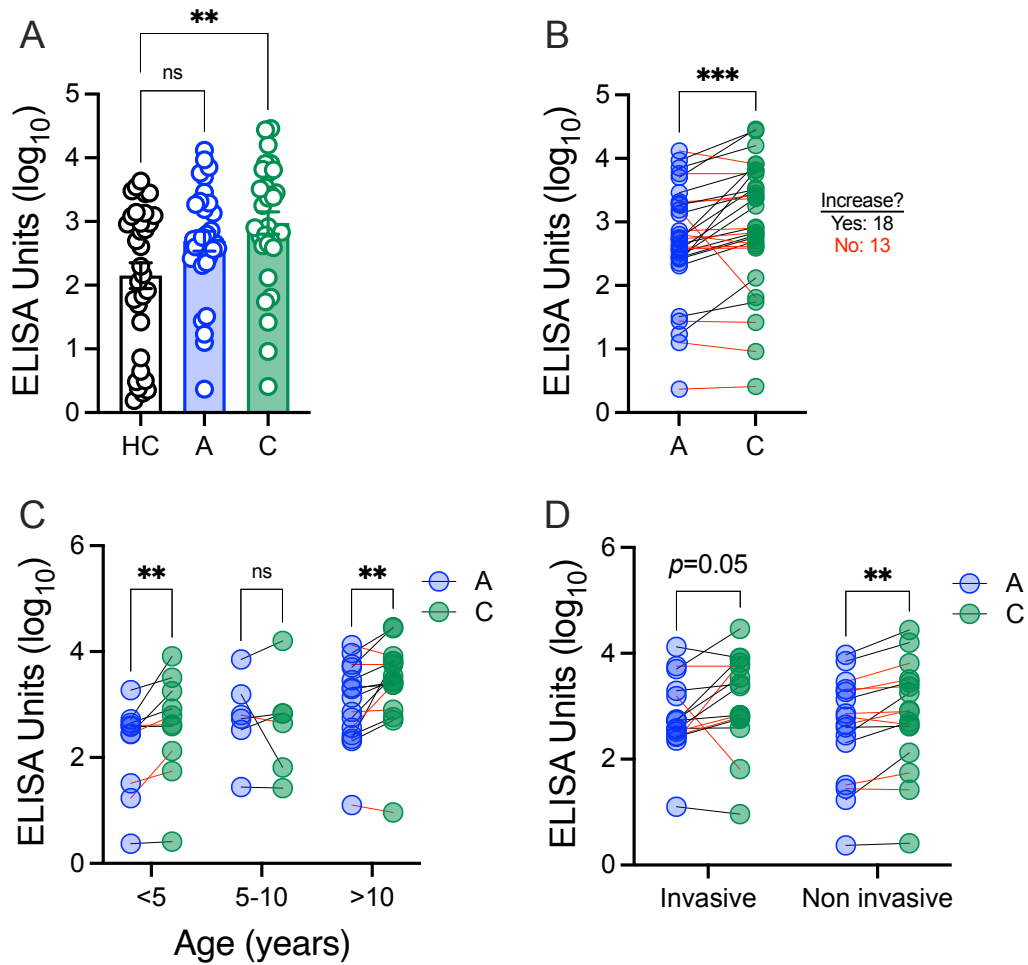

13  
 14 **Supplementary Figure 2. Hla-specific IgG1 levels during acute infection and**  
 15 **convalescence.** (A) Levels of Hla-specific IgG1 in healthy children (HC), during acute *S.*  
 16 *aureus* infection (A), or during convalescence (C). (B) Change in Hla-specific IgG1 levels for  
 17 individual study subjects from acute infection to convalescence. (C) Change in IgG1 levels  
 18 from acute *S. aureus* infection (A) to convalescence (C) based on the age of the study subject.  
 19 (D) Change in IgG1 levels from acute infection to convalescence based on the severity of  
 20 infection (invasive vs. non-invasive). Black lines indicate subjects for whom IgG1 levels  
 21 increased  $\geq 1.5$  fold; red lines indicates subjects for whom IgG levels did not increase. Data  
 22 are expressed as arbitrary ELISA units (log<sub>10</sub>) and presented as the median values with  
 23 individual values superimposed on the plots. Log<sub>10</sub>-transformed values were compared by  
 24 one-way ANOVA with Kruskal-Wallis post-test (A) or Wilcoxon matched-pairs signed rank test  
 25 (B-D). \* indicates  $p < 0.05$ ; \*\*  $p < 0.01$ ; \*\*\*  $p < 0.001$ ; ns not significant.

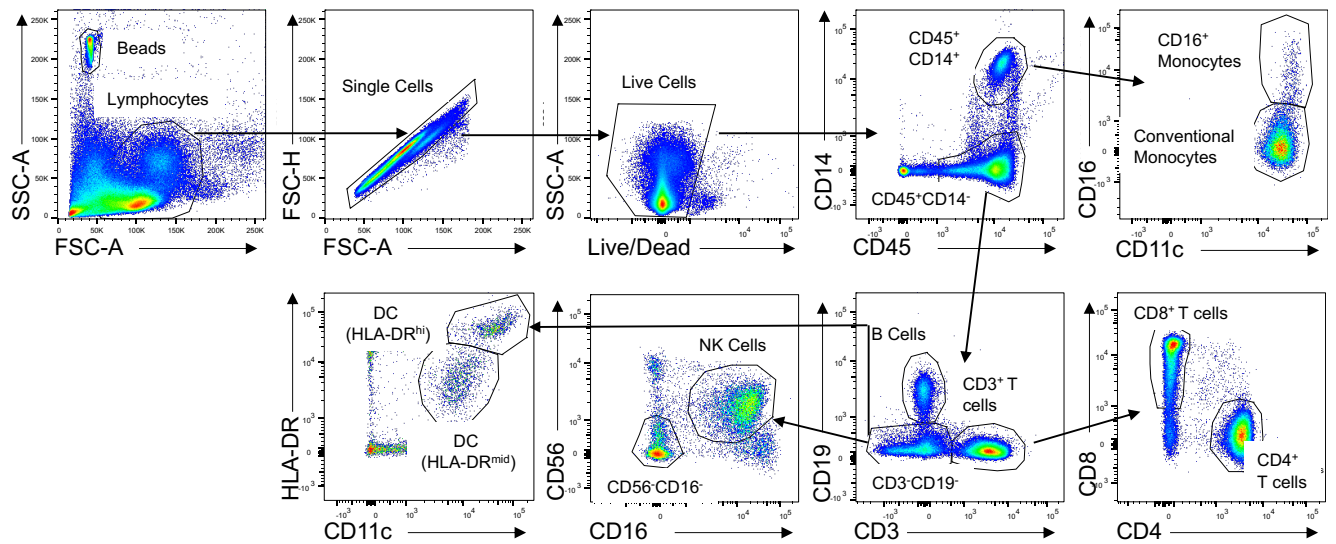

26

27 **Supplementary Figure 3. Gating strategy for flow cytometric identification of immune**

28 **cells.** Cells were gated as single cells, followed by live/dead staining. Live cells were then

29 gated as CD45<sup>+</sup>CD14<sup>+</sup>CD16<sup>-</sup> monocytes, CD45<sup>+</sup>CD14<sup>-</sup>CD3<sup>+</sup>CD4<sup>+/-</sup>CD8<sup>+/-</sup> T cells, CD45<sup>+</sup>CD14<sup>-</sup>

30 CD3<sup>-</sup>CD19<sup>+</sup> B cells, CD45<sup>+</sup>CD14<sup>-</sup>CD16<sup>+</sup>CD56<sup>+</sup> NK cells, or CD45<sup>+</sup>CD14<sup>-</sup>CD11c<sup>+</sup>HLA-DR<sup>hi</sup>

31 dendritic cells (DC).

32

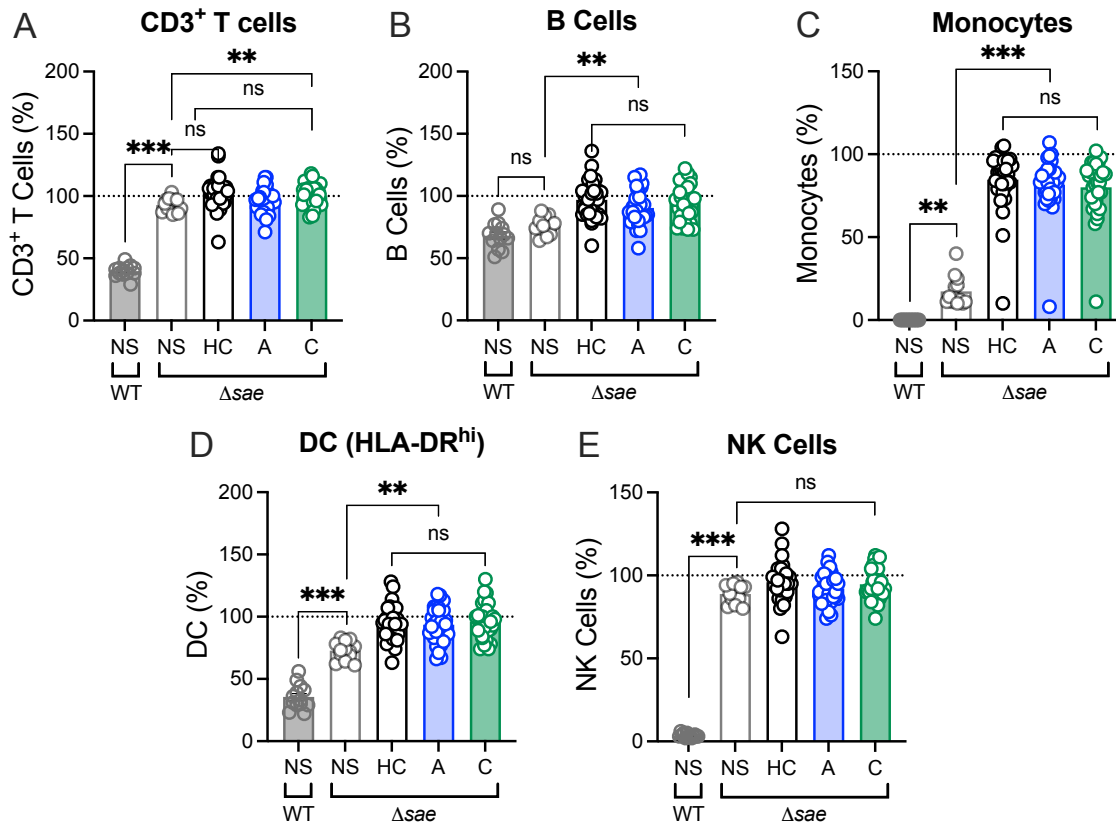

33

34 **Supplementary Figure 4. Killing of immune cells is dependent on expression of *saeRS*-**

35 **regulated toxins.** PBMCs from healthy adults were incubated with wild-type (WT) or  $\Delta$ *sae* *S.*

36 *aureus* supernatant and serum from study subjects (HC – healthy control; A – acute infection;

37 C – convalescence) followed by quantification of live immune cells by flow cytometry (gating

38 strategy, Fig S2). Compared with WT supernatant, that resulted in death of large numbers of T

39 cells (A), monocytes (C), DC (D), and NK cells (E) in the absence of serum (NS),  $\Delta$ *sae*

40 supernatant resulted in less killing (WT NS vs.  $\Delta$ *sae* NS).  $\Delta$ *sae* supernatant killed large

41 numbers of monocytes (C), but neither WT nor  $\Delta$ *sae* supernatant was highly toxic to B cells

42 (B). There were no significant differences in cell survival following incubation with  $\Delta$ *sae* among

43 healthy children, acutely-infected children, or during convalescence. Data are expressed as %

44 cell survival, compared with no supernatant control (dashed line at 100%) and presented as

45 the median values with individual values superimposed on the plots. Data were compared by

46 one-way ANOVA with Kruskal-Wallis post-test. \* indicates  $p < 0.05$ ; \*\*  $p < 0.01$ ; \*\*\*  $p < 0.001$ ; \*\*\*\*

47  $p < 0.0001$ ; ns not significant.

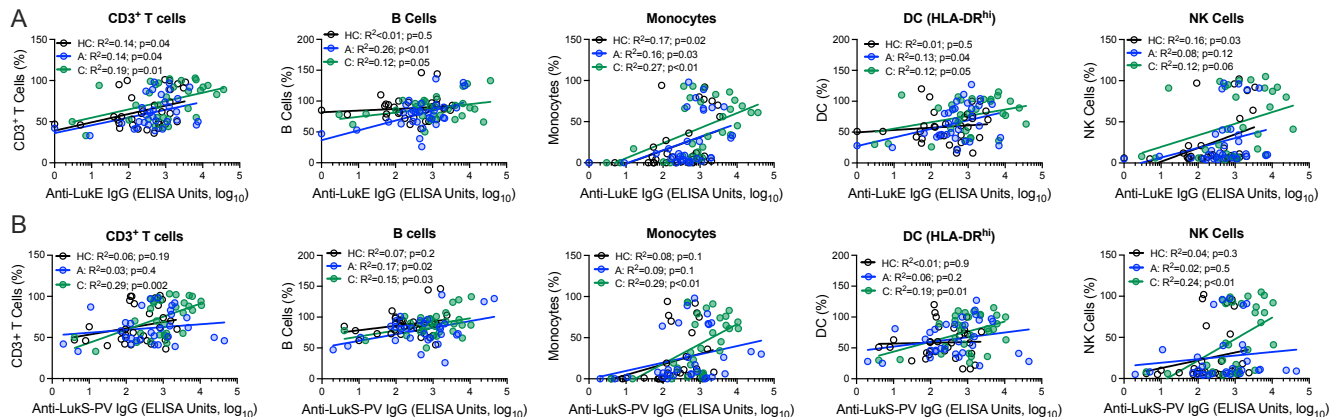

48

49 **Supplementary Figure 5. Correlation of LukE- and LukS-PV-specific antibody levels with**

50 **protection of immune cells against toxin-mediated killing. Correlation of LukE- (A) and**

51 **LukS-PV-specific (B) IgG levels (ELISA units, log<sub>10</sub>) with protection of T cells, B cells,**

52 **Monocytes, Dendritic cells, and NK cells for healthy children (HC), acutely-infected children**

53 **(A), or during convalescence (C). Correlations were determined by linear correlation using**

54 **log<sub>10</sub>-transformed IgG levels.**

55

56

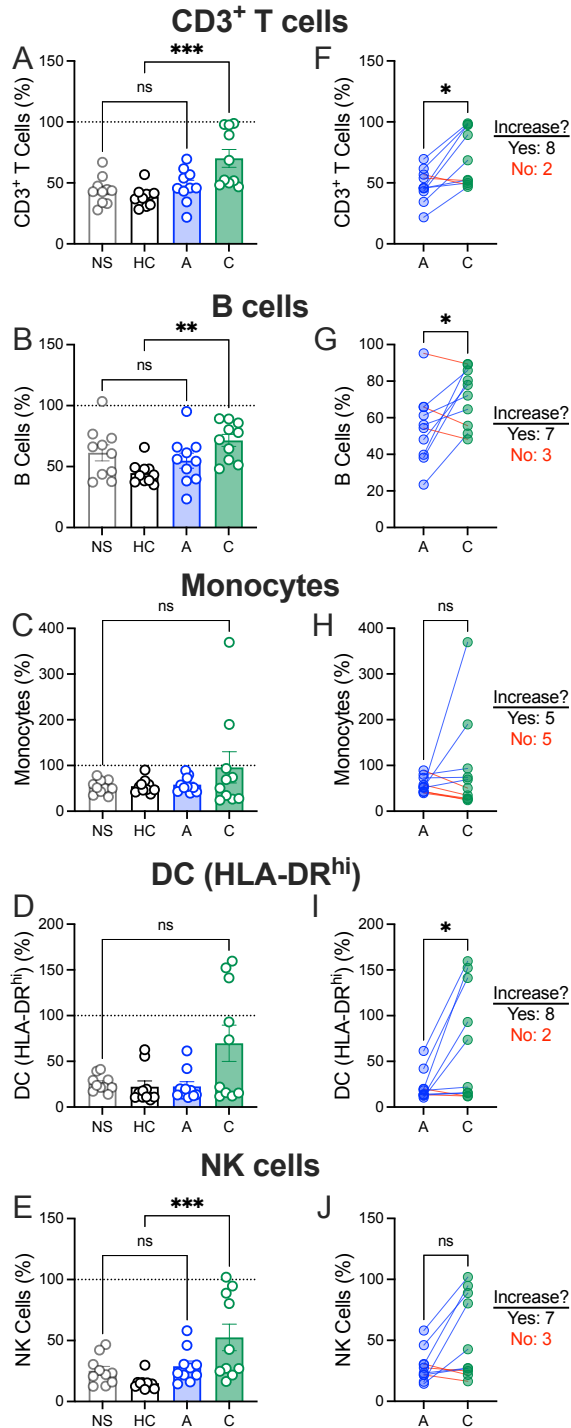

57  
 58 **Supplementary Figure 6. Protection of immune cells against Hla-mediated killing by**  
 59 **acute and convalescent sera.** PBMCs from healthy adults were incubated with recombinant  
 60 active Hla and serum from study subjects followed by quantification of live immune cells by  
 61 flow cytometry (gating strategy, Fig S2). (A-E) Protection of CD3<sup>+</sup> T cells (A), B cells (B),  
 62 monocytes (C), HLA-DR<sup>hi</sup> dendritic cells (DC)(D), and NK cells (E) by serum from healthy

63 children (HC), acutely-infected children (A), and during convalescence (C). “NS” indicates no  
64 serum controls. (F-J) Change in immune cell protection for individual study subjects from acute  
65 infection to convalescence. Black lines indicate subjects for whom immune cell survival  
66 increased  $\geq 10\%$ ; red lines indicate subjects for whom cell survival did not increase. Data are  
67 expressed as % immune cell survival, compared with no supernatant control (not shown) and  
68 presented as the median values with individual values superimposed on the plots. Data were  
69 compared by one-way ANOVA with Kruskal-Wallis post-test (A-E) or Wilcoxon matched-pairs  
70 signed rank test (F-J). \* indicates  $p < 0.05$ ; \*\*  $p < 0.01$ ; \*\*\*  $p < 0.001$ ; \*\*\*\*  $p < 0.0001$ ; ns not  
71 significant.

72

73

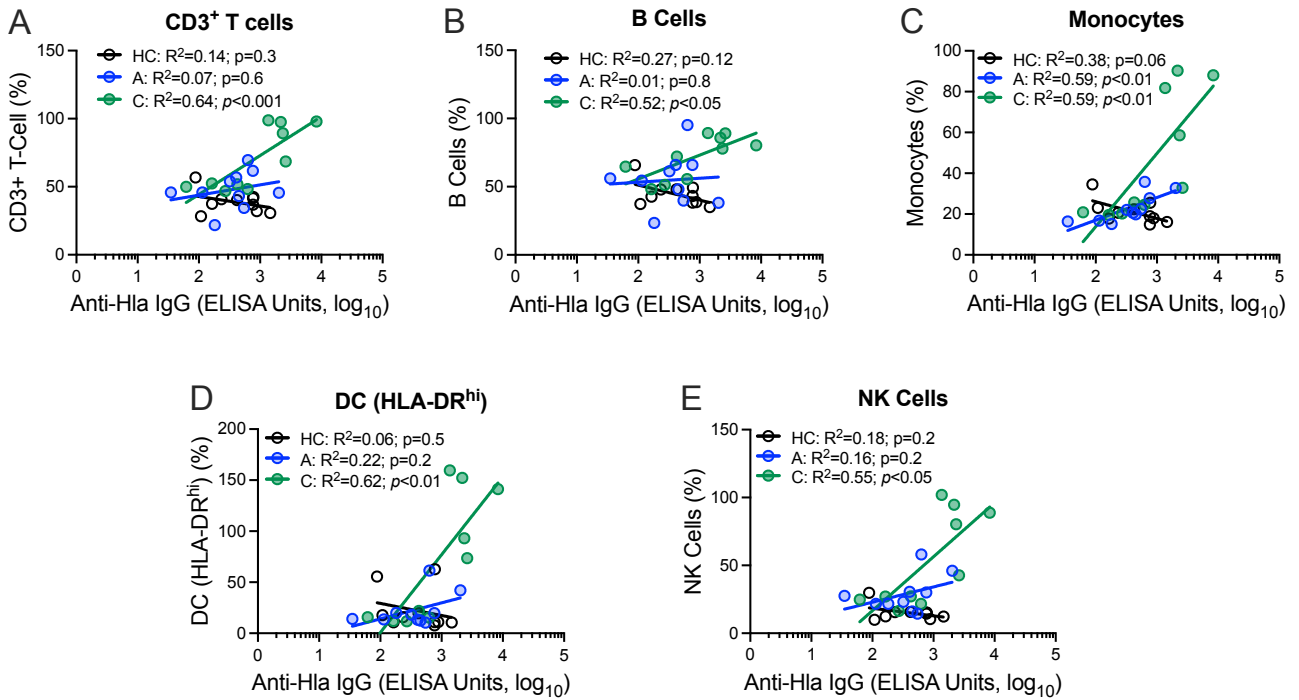

74

75 **Supplementary Figure 7. Hla-specific IgG levels correlate with protection of immune**

76 **cells against Hla-mediated killing.** Correlation of Hla-specific IgG levels (ELISA units,  $\log_{10}$ )

77 with protection of T cells (A), B cells (B), Monocytes (C), Dendritic cells (D), and NK cells (E)

78 for healthy children (HC), acutely-infected children (A), or during convalescence (C).

79 Correlations were determined by linear correlation using  $\log_{10}$ -transformed IgG levels.

80

81 **Supplementary Table 1. Characteristics of children whose serum protects or does not**  
 82 **protect immune cells against toxin-mediated killing.**

|                           |         | Not Protected  | Protected        | <i>p</i> value |
|---------------------------|---------|----------------|------------------|----------------|
| Subjects                  |         | 11             | 21               |                |
| Age in years Median (IQR) |         | 5.8 (1.9, 9.0) | 13.8 (8.3, 15.0) | 0.047          |
| Age Group                 |         |                |                  | 0.024          |
|                           | <=5 yo  | 5 (45%)        | 5 (24%)          |                |
|                           | 5-10 yo | 4 (36%)        | 2 (9.5%)         |                |
|                           | >10 yo  | 2 (18%)        | 14 (67%)         |                |
| Gender                    |         |                |                  | 0.7            |
|                           | Male    | 8 (73%)        | 17 (81%)         |                |
|                           | Female  | 3 (27%)        | 4 (19%)          |                |
| Race/Ethnicity            |         |                |                  | 0.037          |
|                           | White   | 7 (64%)        | 20 (95%)         |                |
|                           | Black   | 4 (36%)        | 1 (4.8%)         |                |
| Invasive Infection        |         |                |                  | >0.9           |
|                           | Yes     | 6 (55%)        | 10 (48%)         |                |
|                           | No      | 5 (45%)        | 11 (52%)         |                |
| Susceptibility            |         |                |                  | >0.9           |
|                           | MRSA    | 4 (36%)        | 7 (33%)          |                |
|                           | MSSA    | 7 (64%)        | 13 (62%)         |                |
|                           | Both    | 0 (0.0%)       | 1 (5%)           |                |
| Fever                     |         | 7 (64%)        | 12 (57%)         | >0.9           |

83
